# Supplementary material for: A self-template approach to synthesize multicore–shell Bi@N-doped carbon nanosheets with interior void space for high-rate and ultrastable potassium storage
Source: Royal Society of Chemistry journal article supplement (doi:10.1039/c9ta13975c), 2020-01-01
Supplement: c9ta13975c1.pdf [file c9ta13975c1.pdf]

## Supporting Information for

### **A self-template approach to synthesize multicore-shell Bi@N-doped carbon nanosheets with interior void space for high-rate and ultrastable potassium storage**

Xiuling Shi,<sup>ab</sup> Jianshuo Zhang,<sup>b</sup> Qianqian Yao,<sup>b</sup> Rui Wang,<sup>ab</sup> Hefeng Wu,<sup>b</sup> Yi Zhao,<sup>\*ab</sup>  
Lunhui Guan<sup>\*b</sup>

<sup>a</sup>College of Chemistry and materials Science, Fujian Normal University, Fuzhou,  
Fujian 350007, China

<sup>b</sup>CAS Key Laboratory of Design and Assembly of Functional Nanostructures, and  
Fujian Key Laboratory of Nanomaterials, Fujian Institute of Research on the Structure  
of Matter, Chinese Academy of Sciences, Fuzhou, Fujian 350108, China

\*Corresponding authors

E-mail: zhaoyi@fjirsm.ac.cn, guanlh@fjirsm.ac.cn

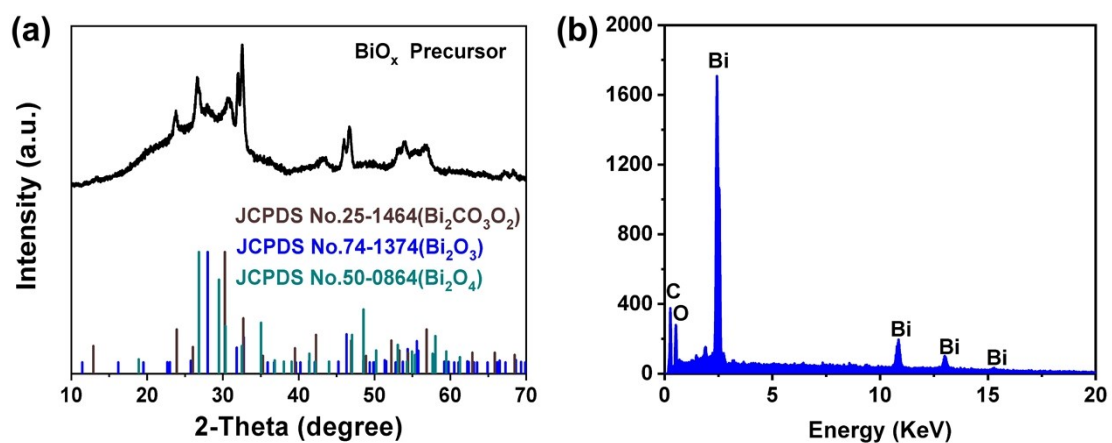

**Fig. S1** (a) XRD patterns and (b) energy dispersive X-ray spectroscopy of the  $\text{BiO}_x$  precursor.

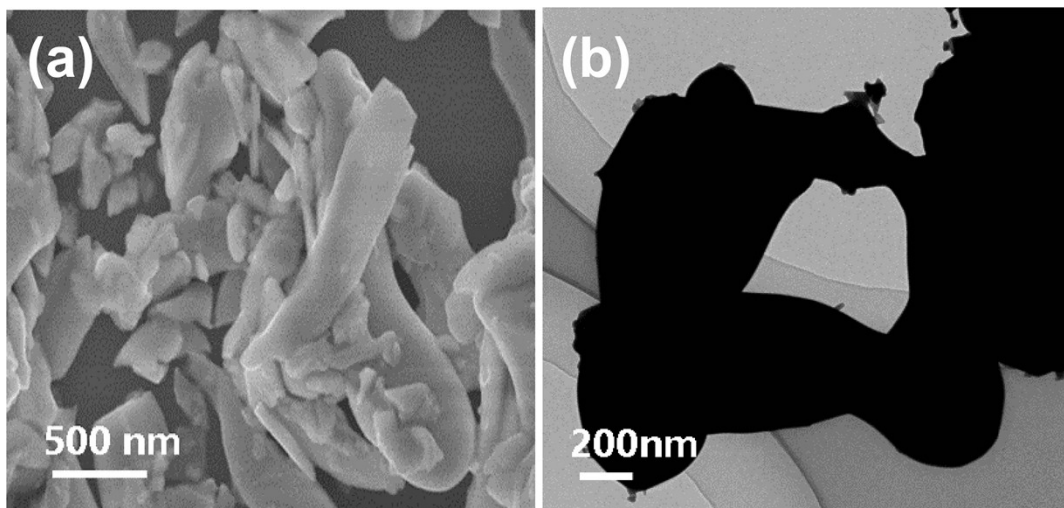

**Fig. S2** SEM (a) and TEM (b) images of Bi particles through direct calcination treatment of BiOx precursor under Ar/H<sub>2</sub> atmosphere reduction treatment.

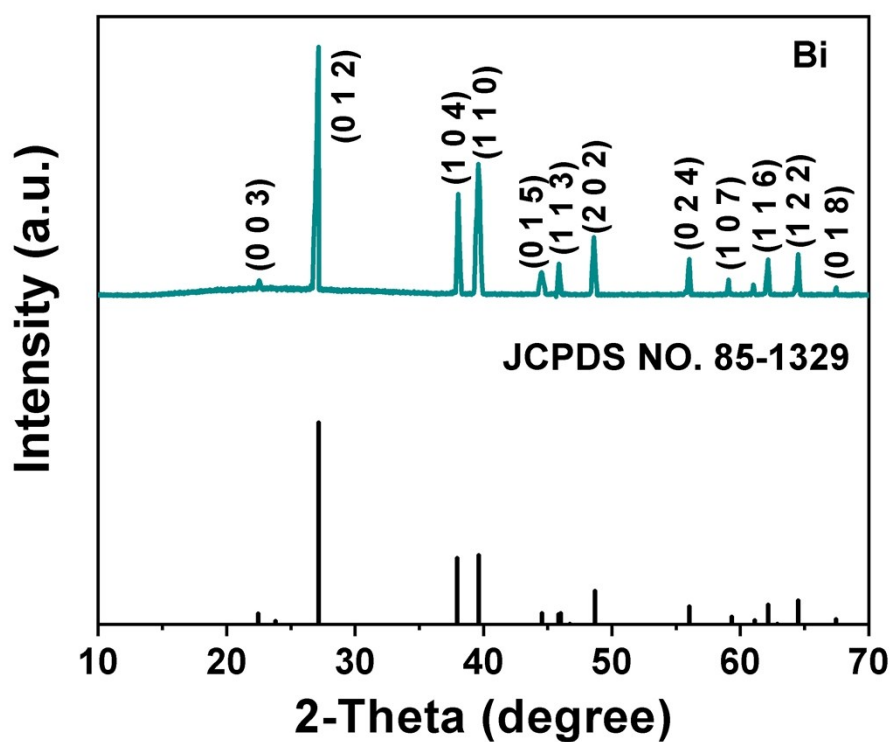

**Fig. S3** XRD patterns of the pure Bi.

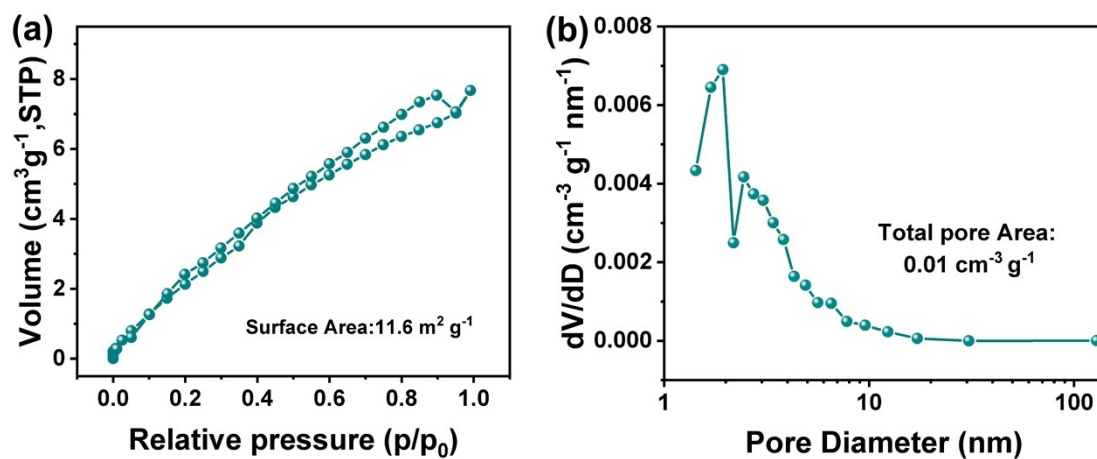

Fig. S4 (a) Nitrogen adsorption-desorption isotherms and (b) pore size distribution curves of pure Bi.

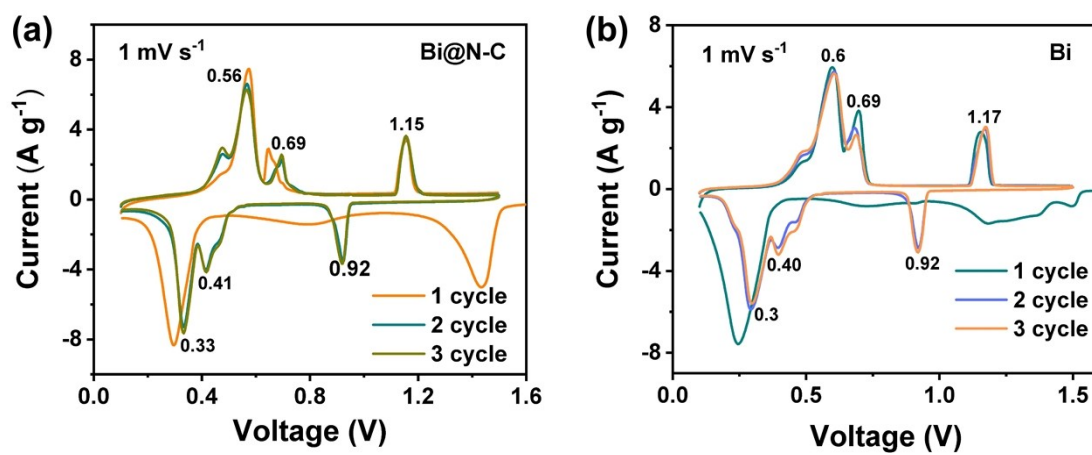

Fig. S5 CV curves of (a) Bi@N-C and (b) Bi electrodes at a scan rate of 1 mV s<sup>-1</sup>.

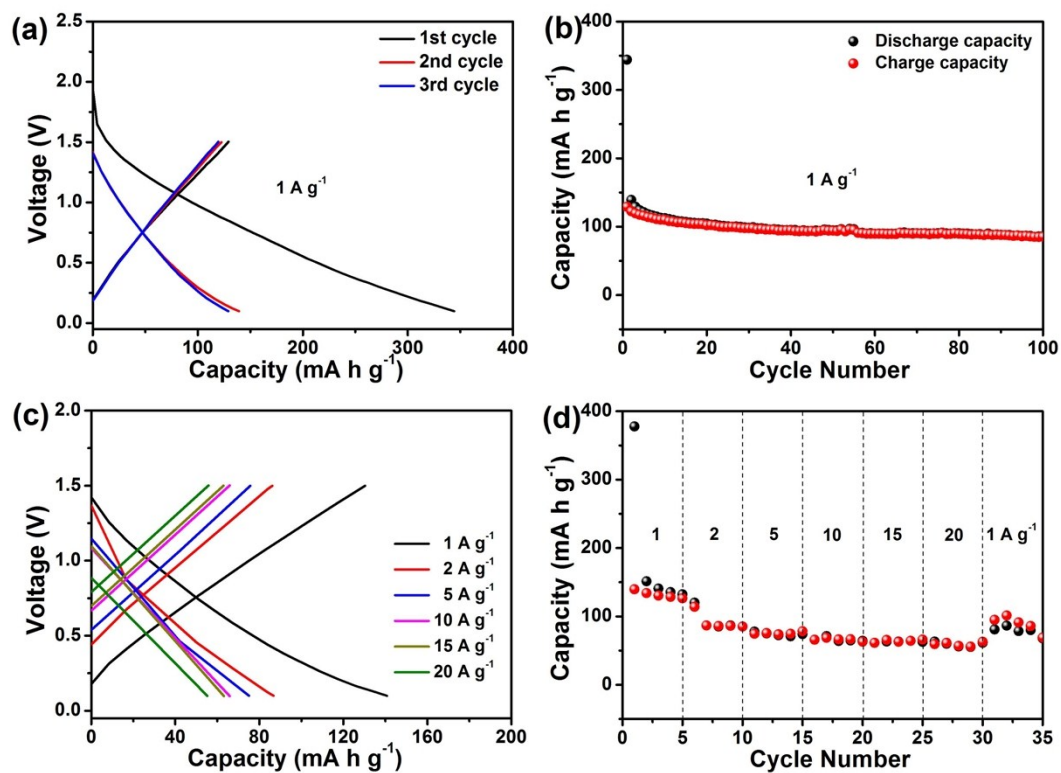

**Fig.S6** potassium storage performance of N-doped carbon. (a) Discharge and charge profiles at  $1 \text{ A g}^{-1}$  for the initial three cycles, (b) cycling performance at  $1 \text{ A g}^{-1}$ , (c) typical discharge/charge curves under various rates, and (d) rate capabilities of N-doped carbon from 1 to  $20 \text{ A g}^{-1}$ .

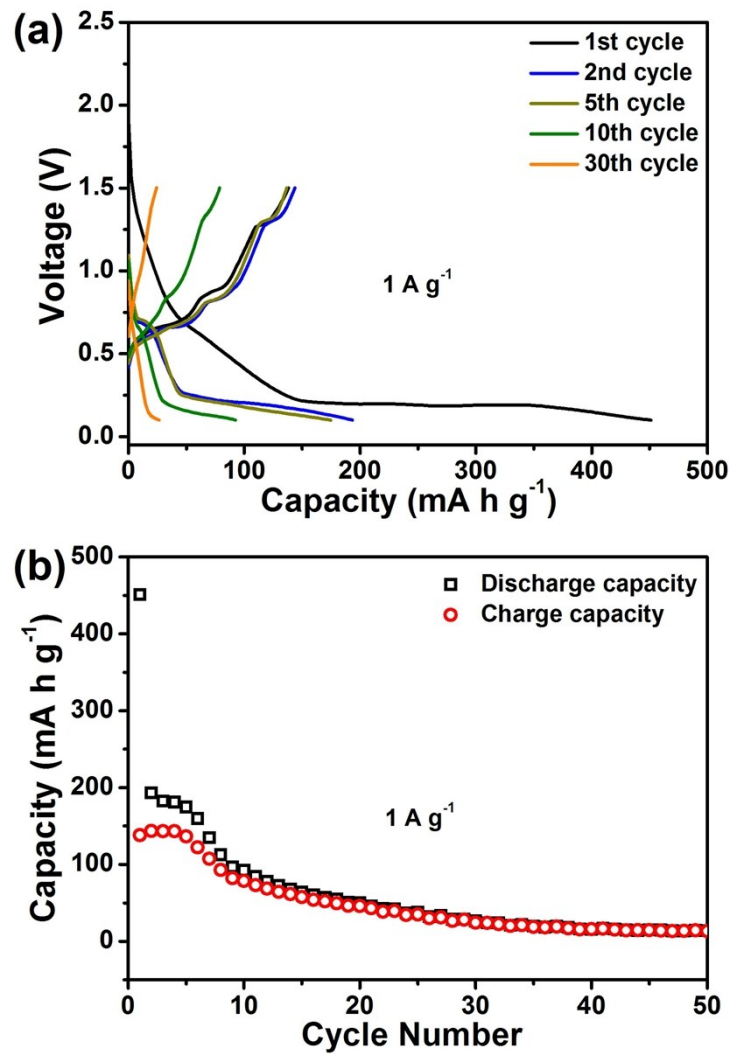

**Fig. S7** (a) Discharge/charge profiles, and (b) cycling stability of Bi@N-C electrode for KFP<sub>6</sub> in EC/PC electrolyte.

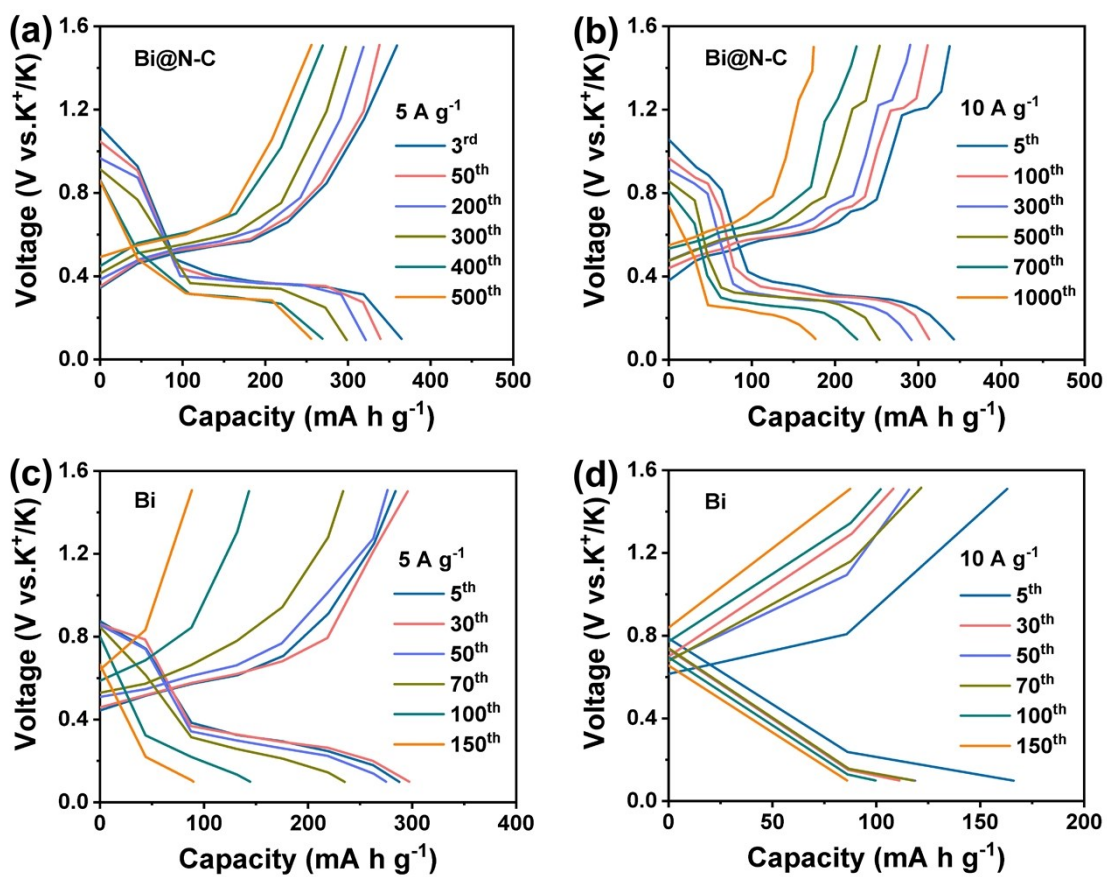

**Fig. S8** Typical discharge/charge curves for selected cycles of (a-b) Bi@N-C and (c-d) Bi electrodes at current densities of (a, c) 5 A g<sup>-1</sup> and (b, d) 10 A g<sup>-1</sup>.

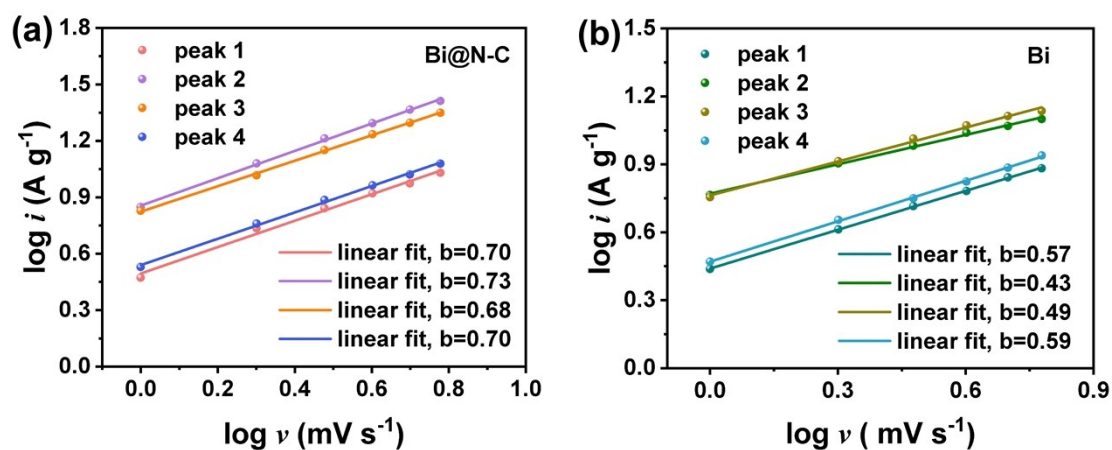

**Fig. S9** Log ( $i$ ) versus log ( $v$ ) plots at different oxidation and reduction states of (a) Bi@N-C and (b) Bi electrode.

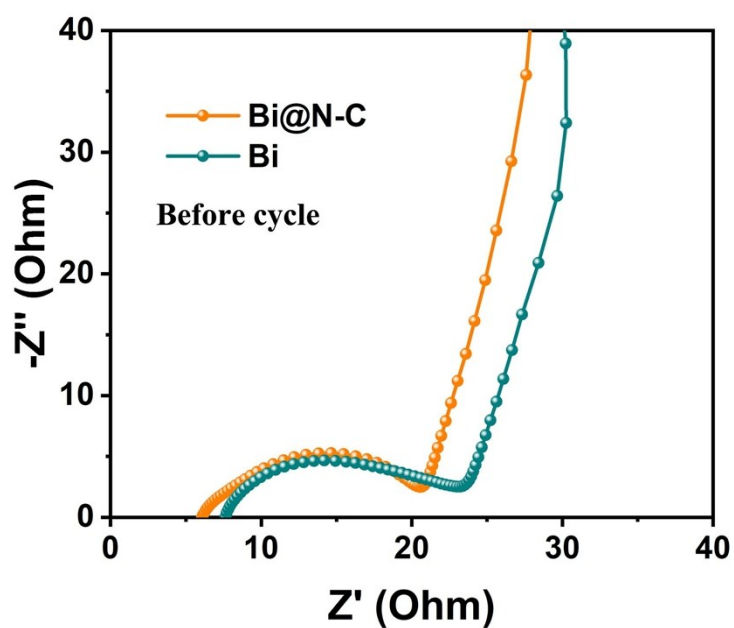

**Fig. S10** EIS profiles of Bi@N-C and Bi electrodes before cycle.



Table S1. Electrochemical performance of alloy-based anodes for PIBs.

| Anode                               | Current density (A g <sup>-1</sup> ) | Cycle Number | Capacity (mA h g <sup>-1</sup> ) | Rate (mA h g <sup>-1</sup> /A g <sup>-1</sup> ) | References                                             |
|-------------------------------------|--------------------------------------|--------------|----------------------------------|-------------------------------------------------|--------------------------------------------------------|
| Bi                                  | 0.4                                  | 100          | 392                              | -                                               | <i>Adv. Energy Mater.</i> , <b>2018</b> , 8, 1703496   |
| Bi                                  | 0.08                                 | 50           | 200                              | -                                               | <i>J. Phys. Chem. C</i> , <b>2018</b> , 122, 18266     |
| Bi                                  | 0.8                                  | 300          | 322                              | 320/2                                           | <i>Angew. Chem. Int. Ed.</i> , <b>2018</b> , 57, 4687  |
| Bi@C                                | 0.1                                  | 35           | 151                              | -                                               | <i>Chem. Sci.</i> , <b>2018</b> , 9, 6193              |
| Bi/rGO                              | 0.05                                 | 200          | ~100                             | 235/0.5                                         | <i>Adv. Energy Mater.</i> , <b>2018</b> , 8, 1703288   |
| Bi/G                                | 0.5                                  | 50           | 240                              | 200/10                                          | <i>Small</i> , <b>2019</b> , 1905789                   |
| Bi@N-C                              | 1                                    | 100          | 268                              | 152/100                                         | <i>Adv. Funct. Mater.</i> , <b>2019</b> , 29, 1809195  |
| Bi@3DGFs                            | 1                                    | 400          | 164                              | 113/10                                          | <i>J. Mater. Chem. A</i> , <b>2019</b> , 7, 4913       |
| C@Bi                                | 0.4                                  | 200          | 200                              | 222/0.8                                         | <i>Matter</i> , <b>2019</b> , 1, 1427                  |
| Sb@CNFs                             | 0.2                                  | 100          | 330                              | 145/5                                           | <i>Angew. Chem. Int. Ed.</i> , <b>2019</b> , 58, 14578 |
| Sb@C                                | 0.2                                  | 504          | 200                              | 530/0.2                                         | <i>Energy Environ. Sci.</i> , <b>2019</b> , 12, 615    |
| Sb@MOF                              | 0.1                                  | 100          | 497                              | 270/1                                           | <i>Chem. Commun.</i> , <b>2019</b> , 55, 12511         |
| Sb@3DC                              | 0.2                                  | 150          | 445                              | 286/1                                           | <i>J. Mater. Chem. A</i> , <b>2019</b> , 7, 9629       |
| Sb <sub>2</sub> Se <sub>3</sub> @C  | 0.5                                  | 400          | 191                              | 174/2                                           | <i>J. Mater. Chem. A</i> , <b>2019</b> , 7, 12283      |
| 3DC/Sn                              | 0.05                                 | 100          | 276                              | 150/0.5                                         | <i>J. Mater. Chem. A</i> , <b>2018</b> , 6, 434        |
| SnS <sub>2</sub> -RGO               | 0.5                                  | 150          | 311                              | 163/1                                           | <i>J. Mater. Chem. A</i> , <b>2019</b> , 7, 19332      |
| SnS <sub>2</sub> @C                 | 1                                    | 1000         | 274                              | 397/2                                           | <i>ChemSusChem</i> , <b>2019</b> , 12, 2689            |
| Sn <sub>4</sub> P <sub>3</sub> @C   | 0.5                                  | 1000         | 160                              | 170/2                                           | <i>Joule</i> , <b>2018</b> , 2, 1534                   |
| Sn <sub>4</sub> P <sub>3</sub> @C   | 0.5                                  | 800          | 181.5                            | 184/2                                           | <i>Energy Storage Mater.</i> , <b>2019</b> , 23, 367   |
| SnSb@NC                             | 0.5                                  | 200          | 186                              | 117/2                                           | <i>J. Mater. Chem. A</i> , <b>2019</b> , 7, 14309      |
| RP/C                                | 1                                    | 60           | 300                              | 71/3                                            | <i>Adv. Sci.</i> , <b>2019</b> , 6, 1801354            |
| (Bi,Sb) <sub>2</sub> S <sub>3</sub> | 0.5                                  | 1000         | 353                              | 300/1                                           | <i>ACS Nano</i> , <b>2019</b> , 13, 3703               |
| (Bi,Sb)@C                           | 0.5                                  | 400          | 226                              | 200/2                                           | <i>J. Mater. Chem. A</i> , <b>2019</b> , 7, 27041      |
| <b>Bi@N-C</b>                       | <b>1</b>                             | <b>100</b>   | <b>356</b>                       | <b>320/10</b>                                   | <b>This work</b>                                       |
|                                     | <b>5</b>                             | <b>500</b>   | <b>256</b>                       | <b>266/20</b>                                   |                                                        |
|                                     | <b>10</b>                            | <b>1000</b>  | <b>180</b>                       | <b>175/30</b>                                   |                                                        |
